# Supplementary material for: Modelling and breaking down the biophysical barriers to drug delivery in pancreatic cancer
Source: Royal Society of Chemistry journal article supplement (doi:10.1039/d3lc00660c), 2024-01-01

A)

Bright-field

DAPI

Collagen type I

Phalloidin

Merged

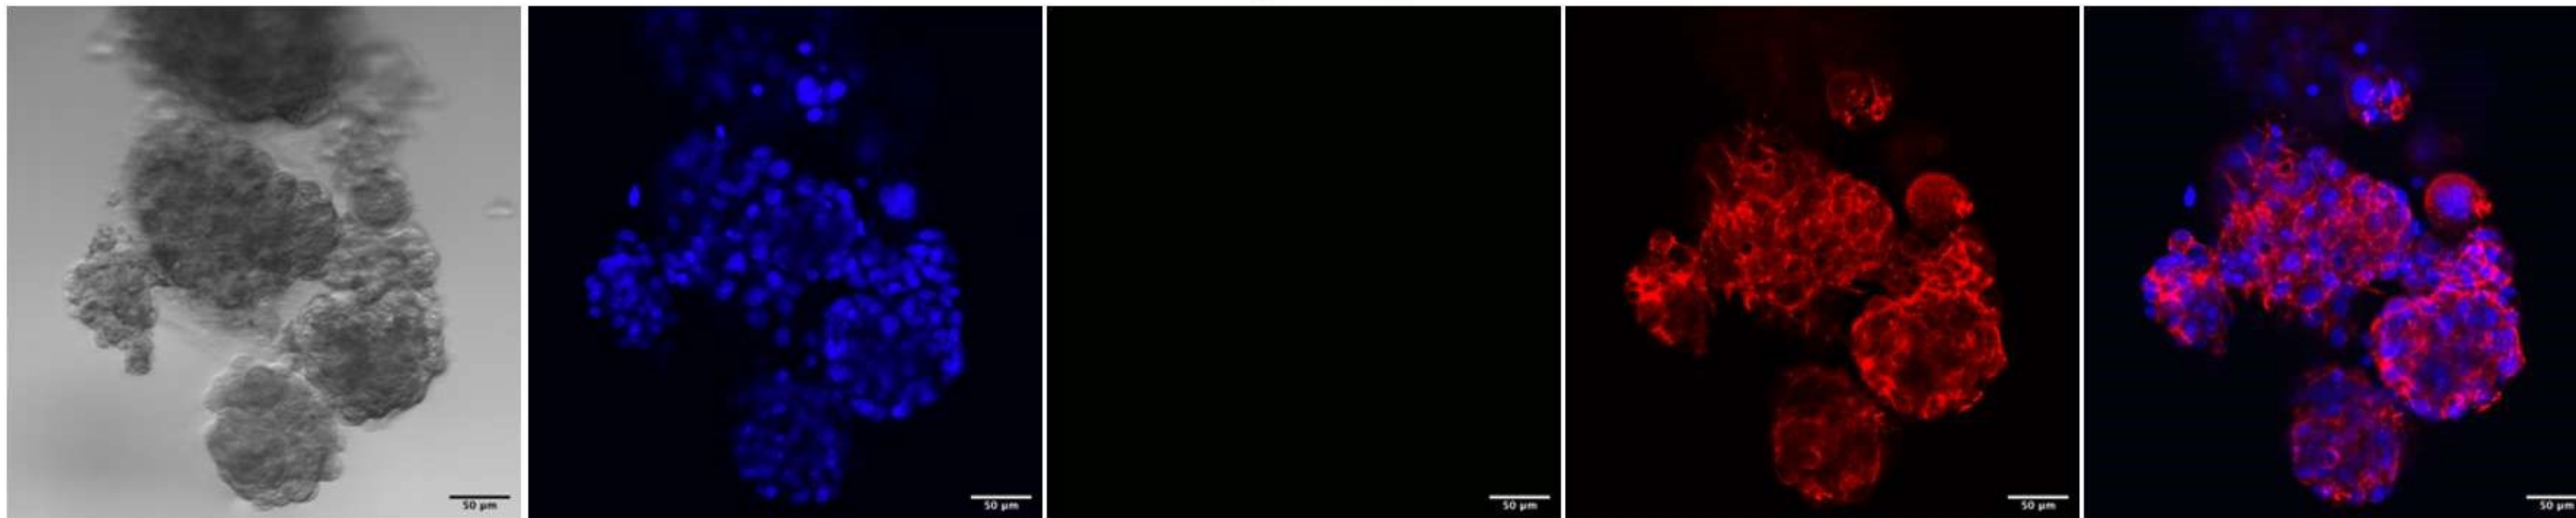

B)

Bright-field

DAPI

HIF-1 alpha

Phalloidin

Merged

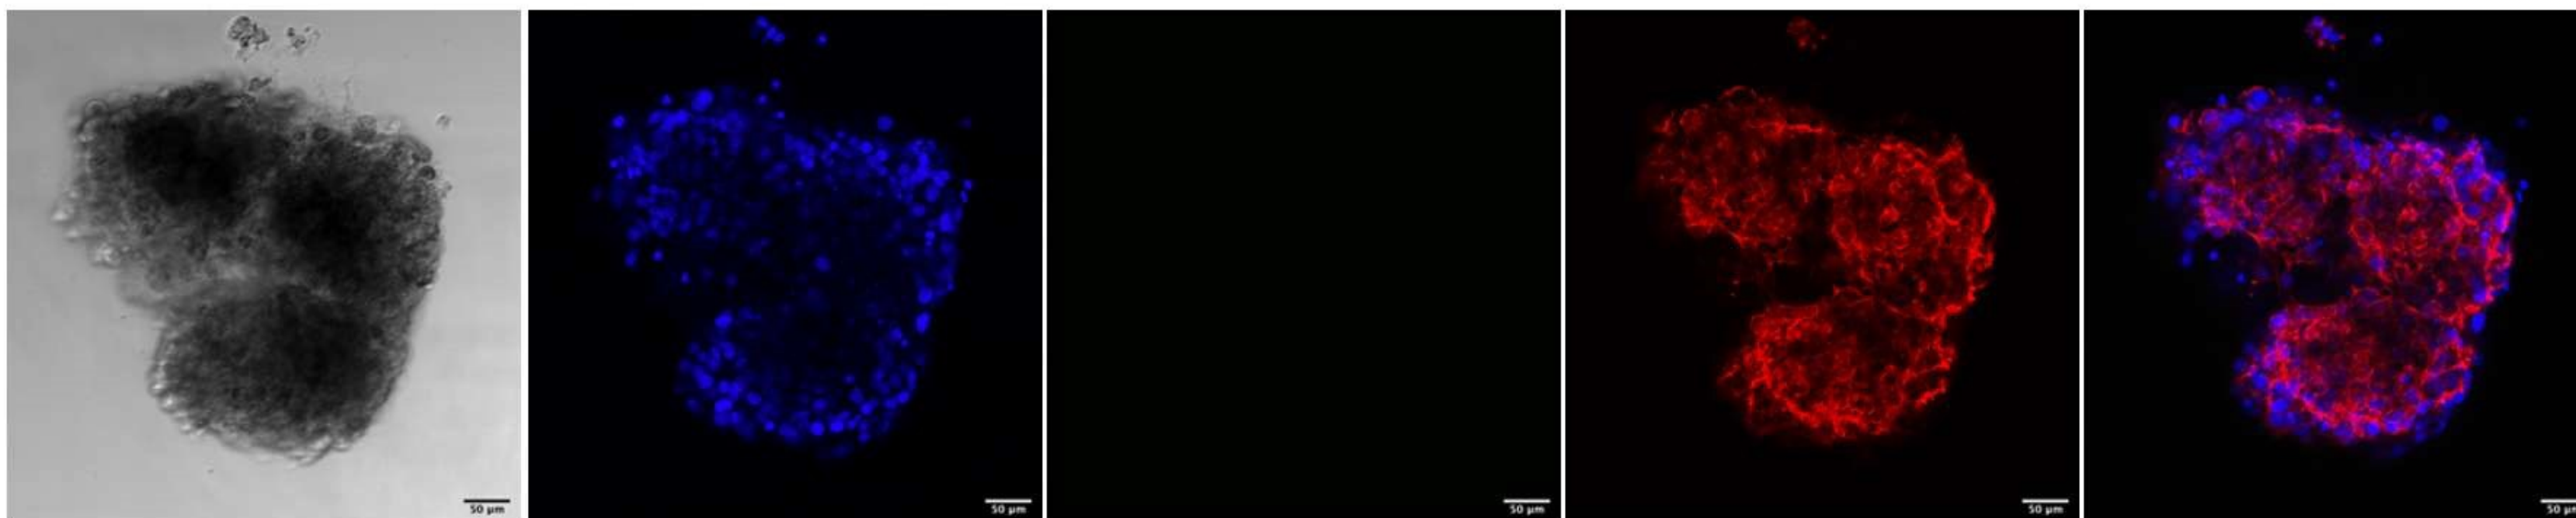

Supplement: d3lc00660c4.pdf [file d3lc00660c4.pdf]
