# Supplementary figures and images for: Modelling and breaking down the biophysical barriers to drug delivery in pancreatic cancer
Source: Royal Society of Chemistry journal article supplement (doi:10.1039/d3lc00660c), 2024-01-01

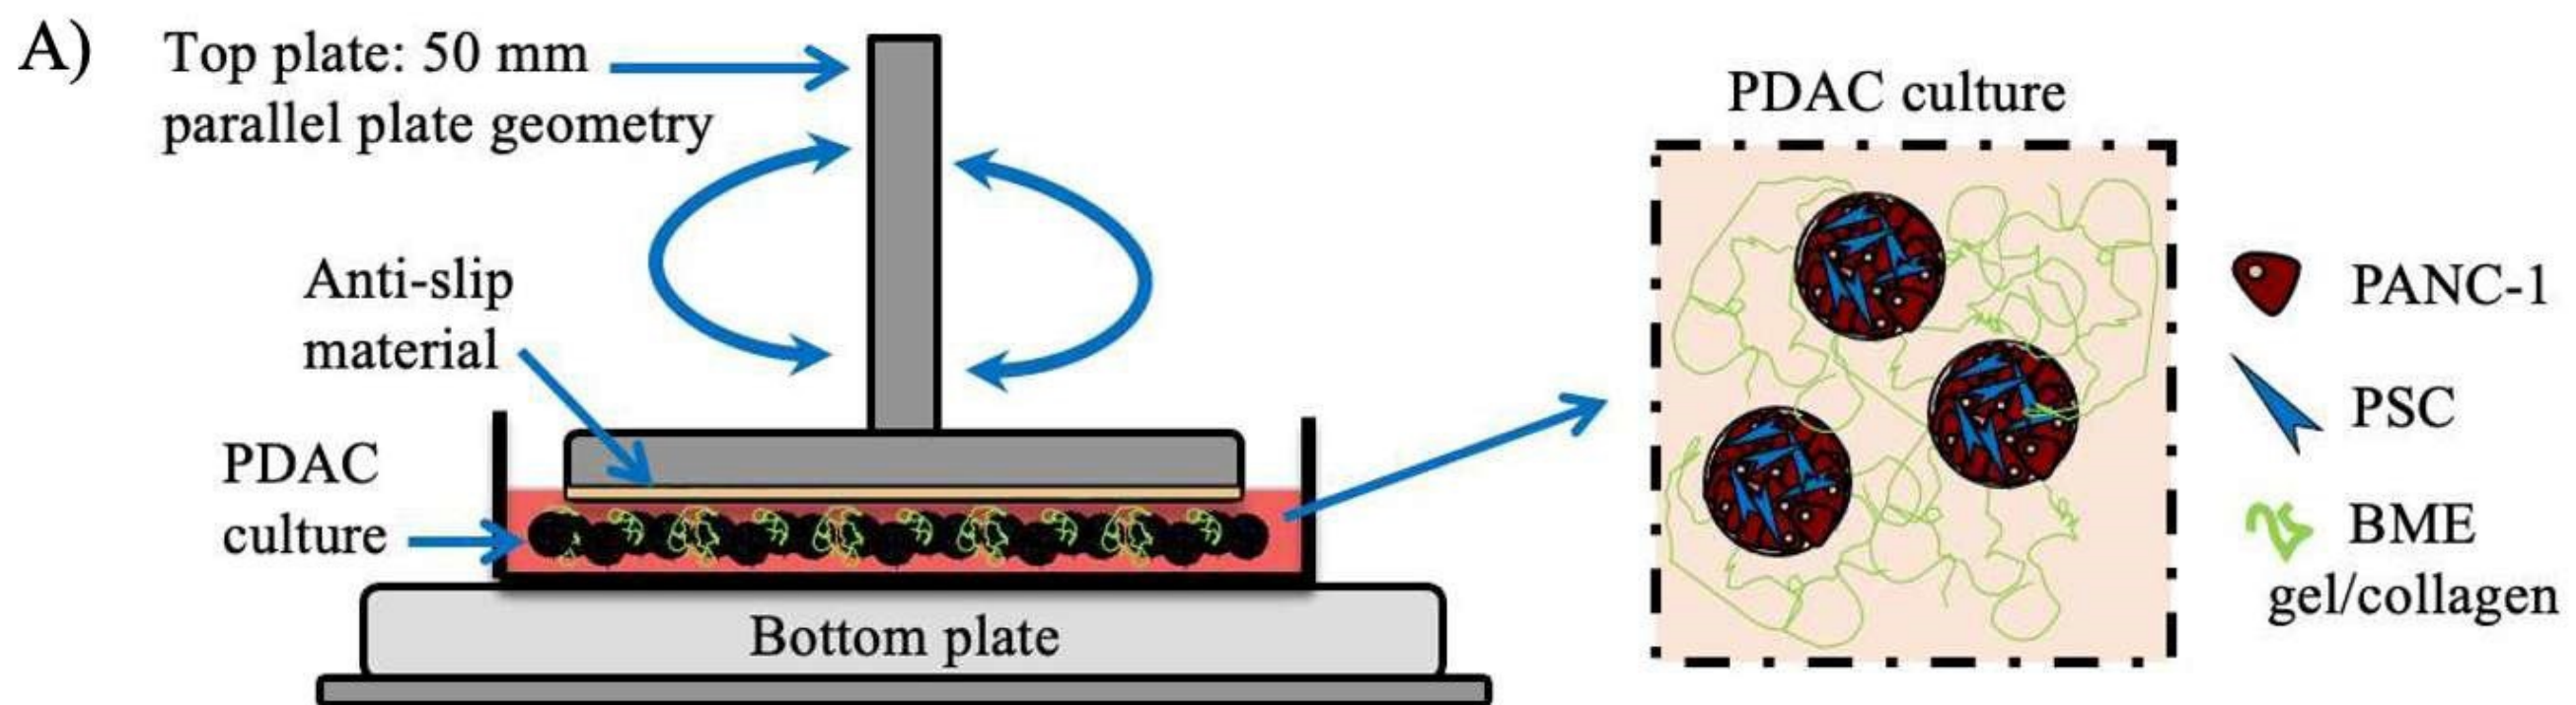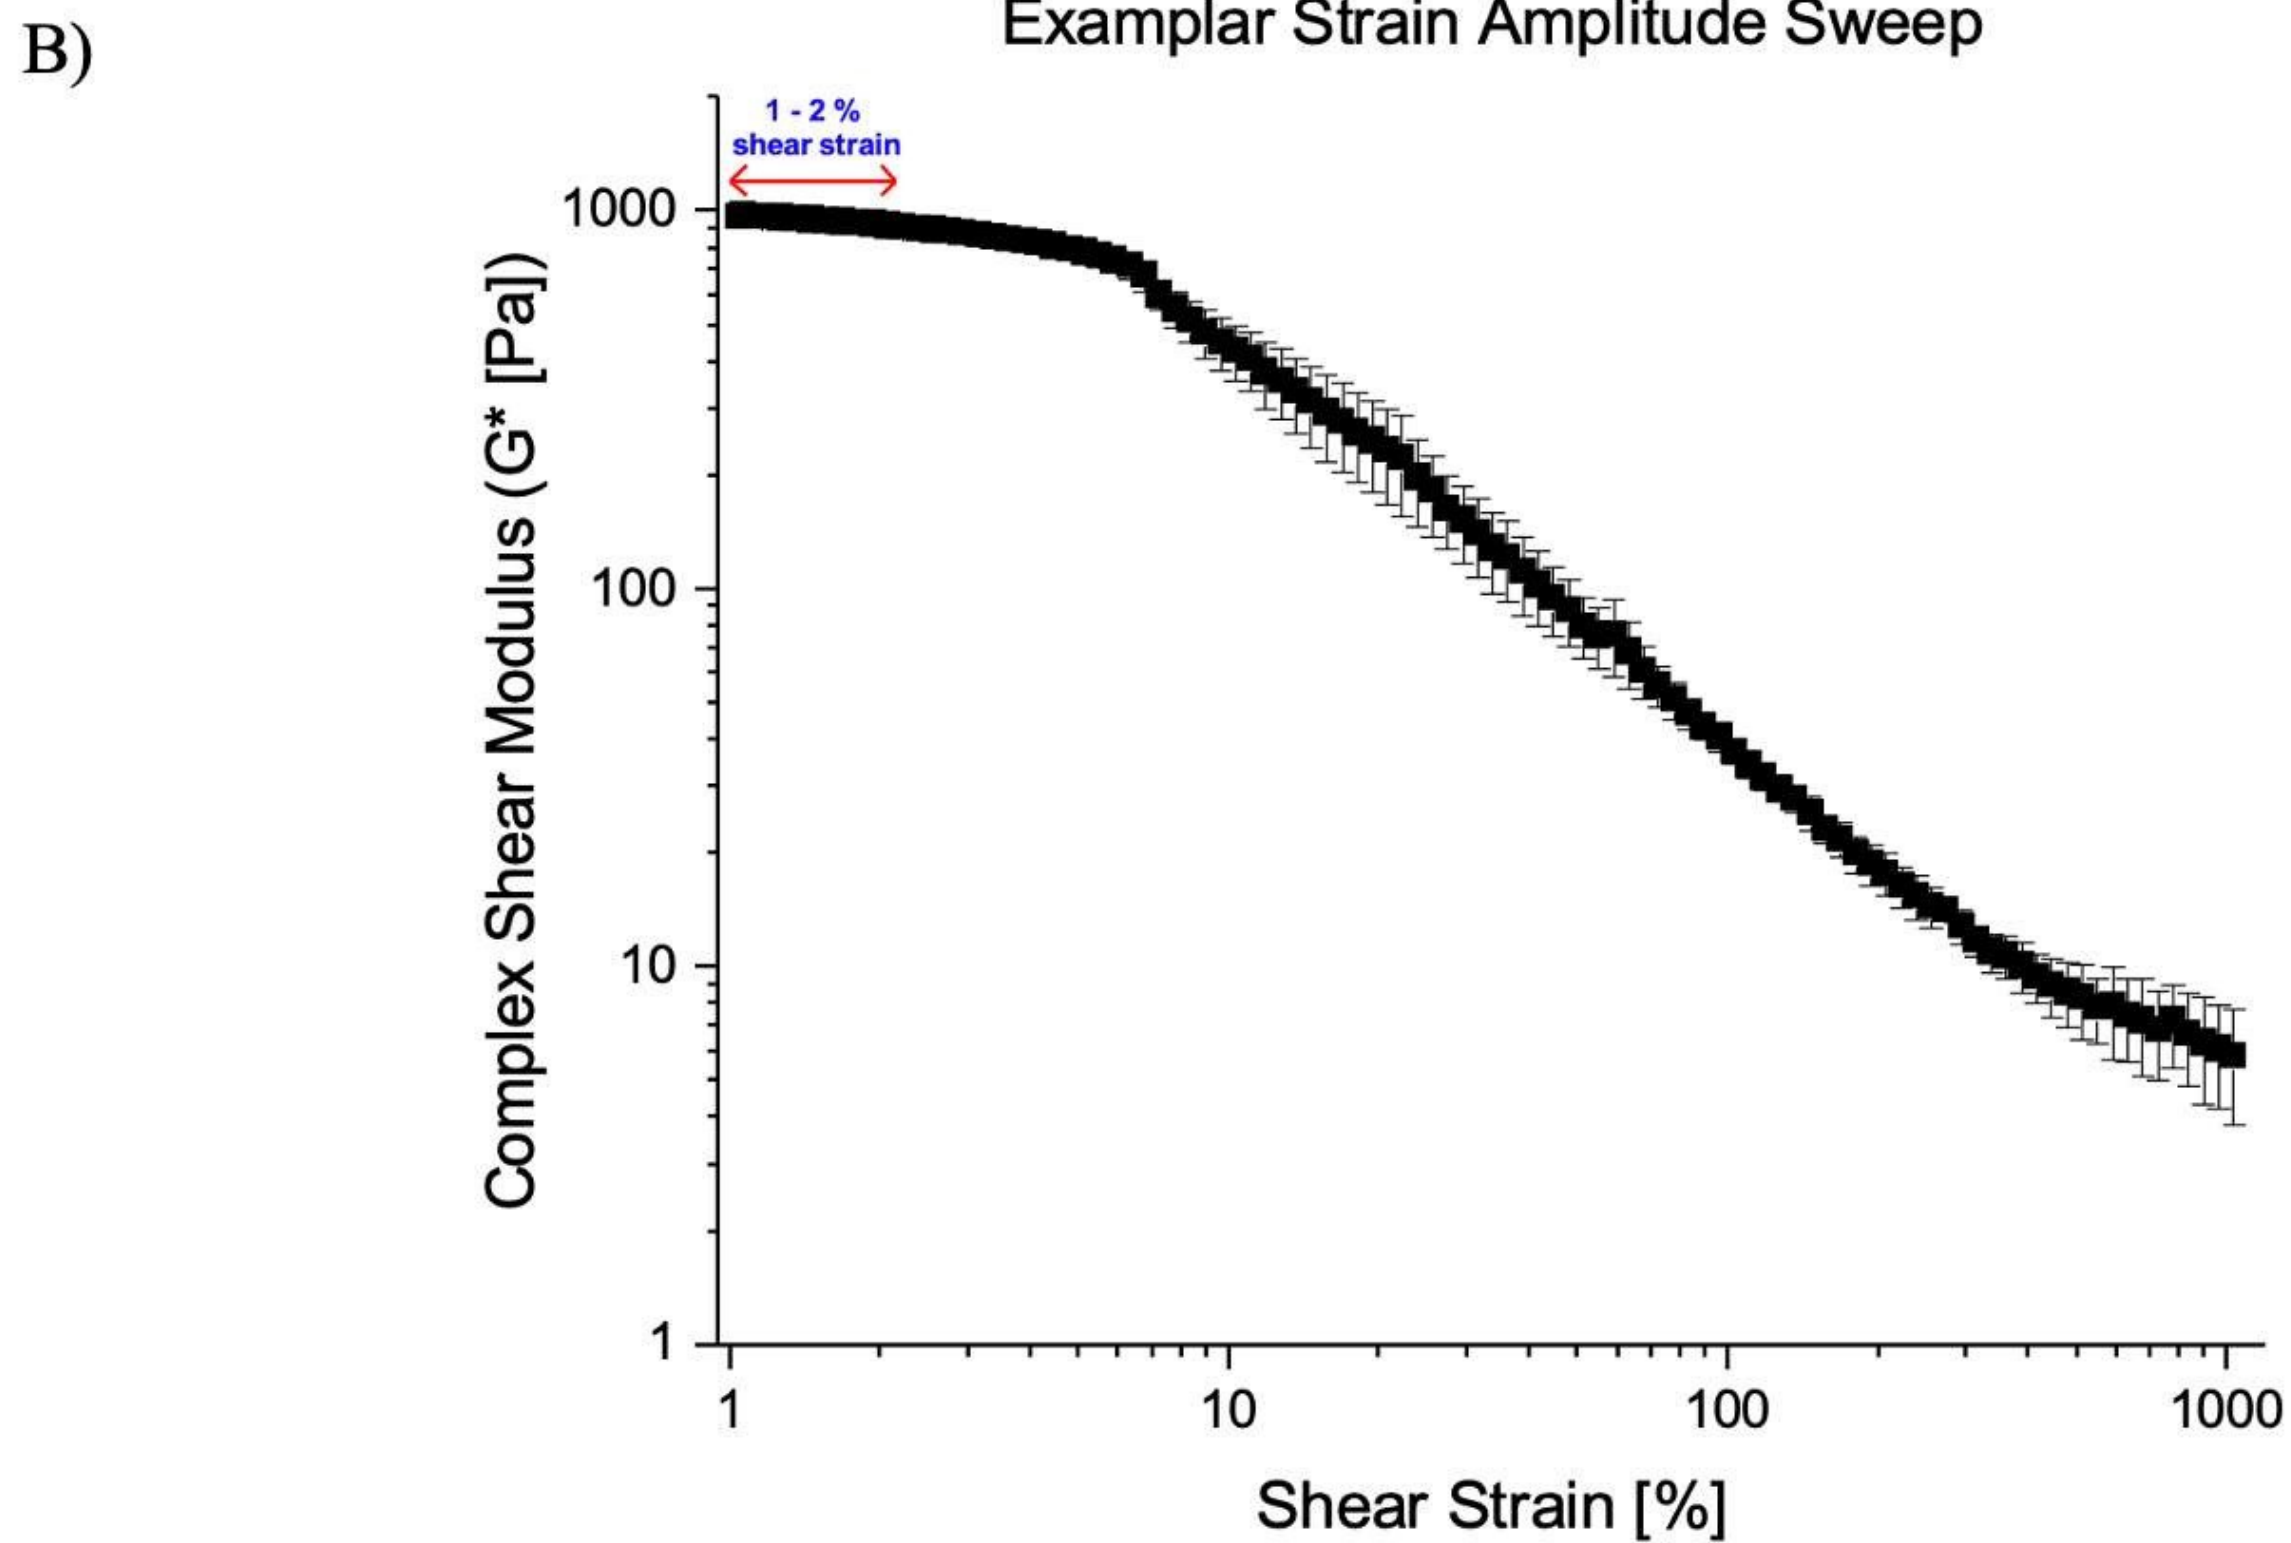

Supplement: d3lc00660c2.pdf [file d3lc00660c2.pdf]

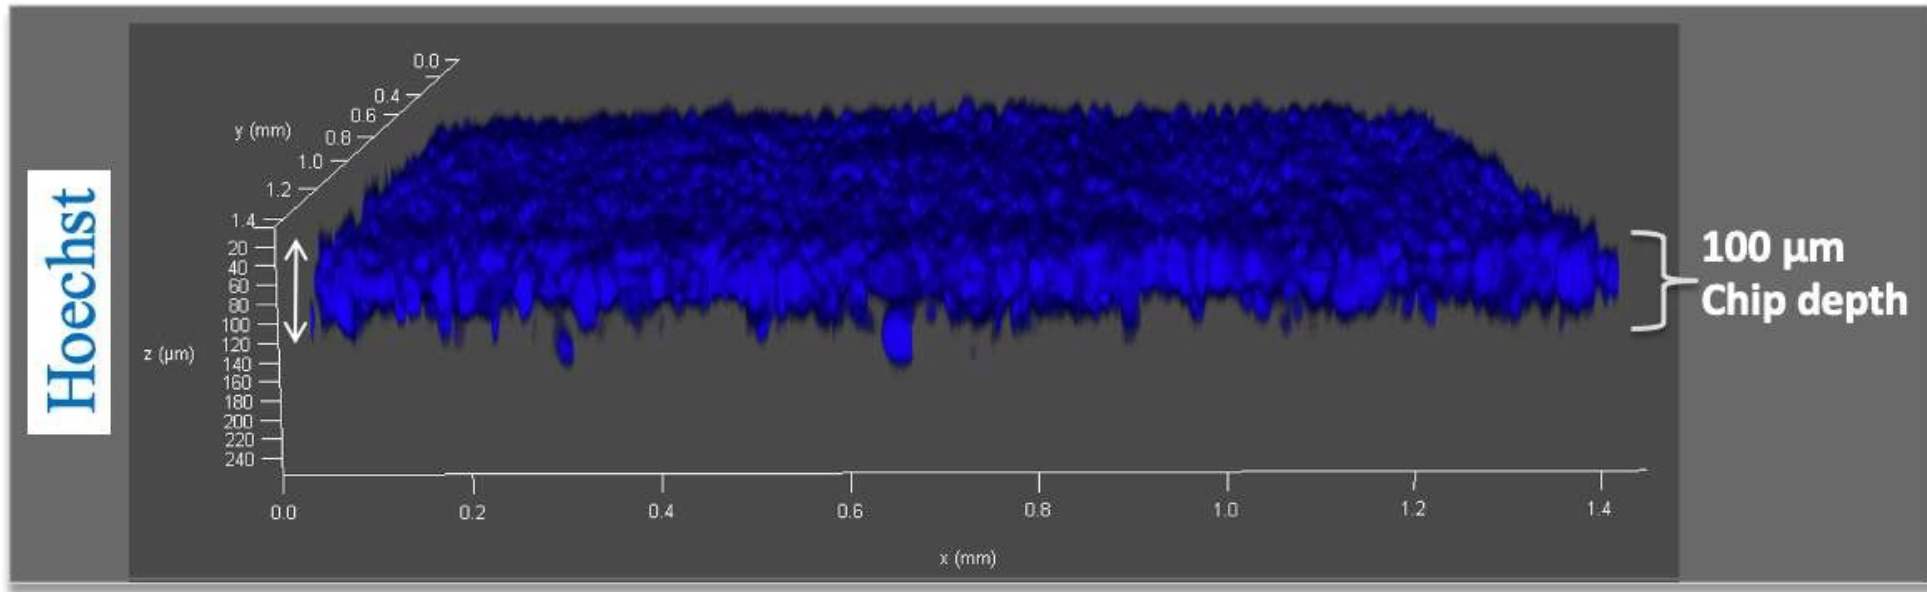

Supplement: d3lc00660c3.pdf [file d3lc00660c3.pdf]

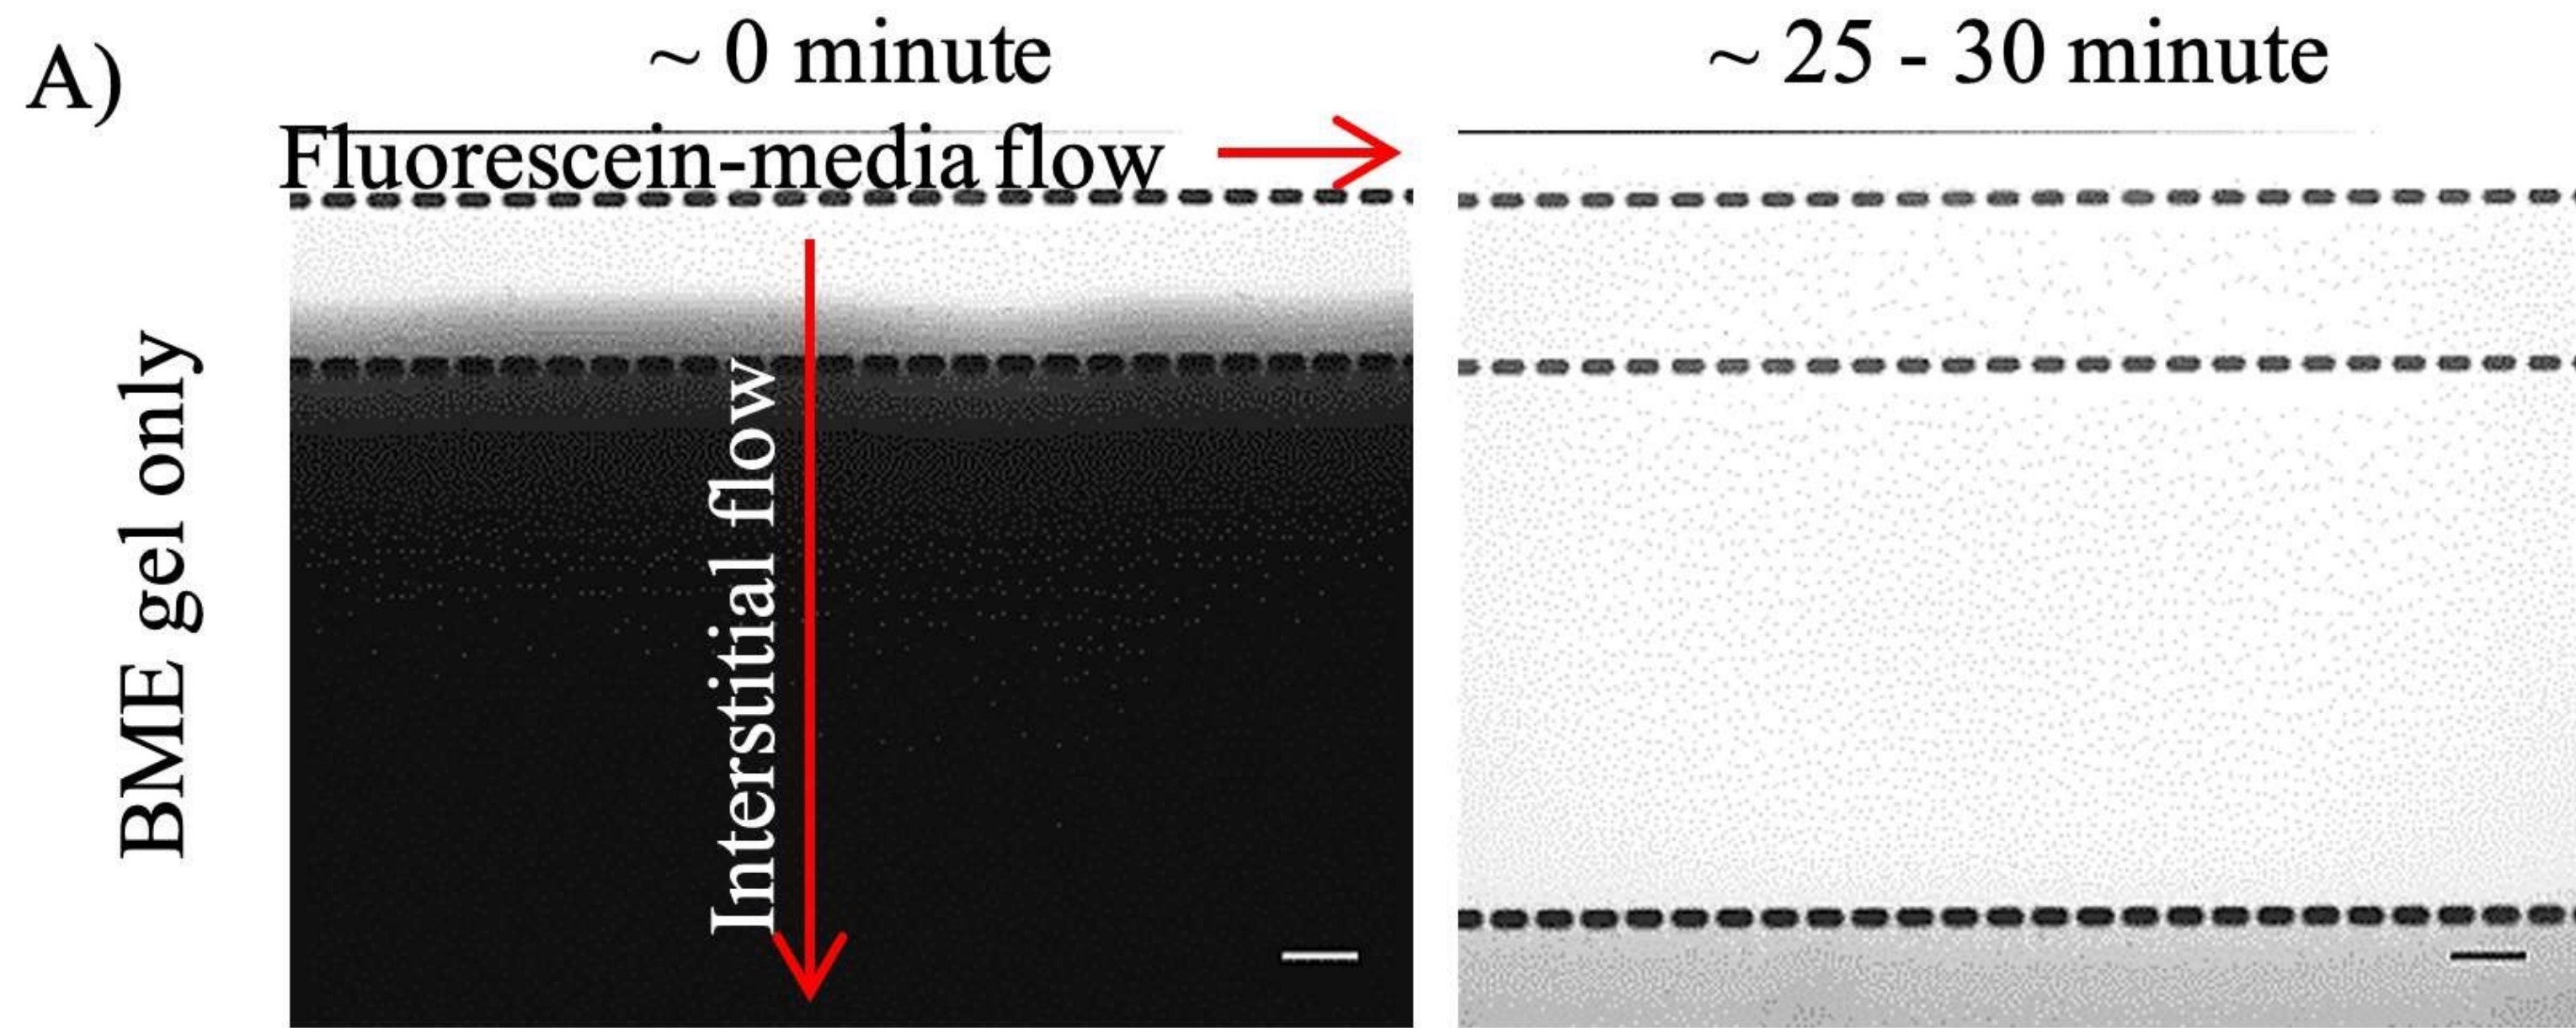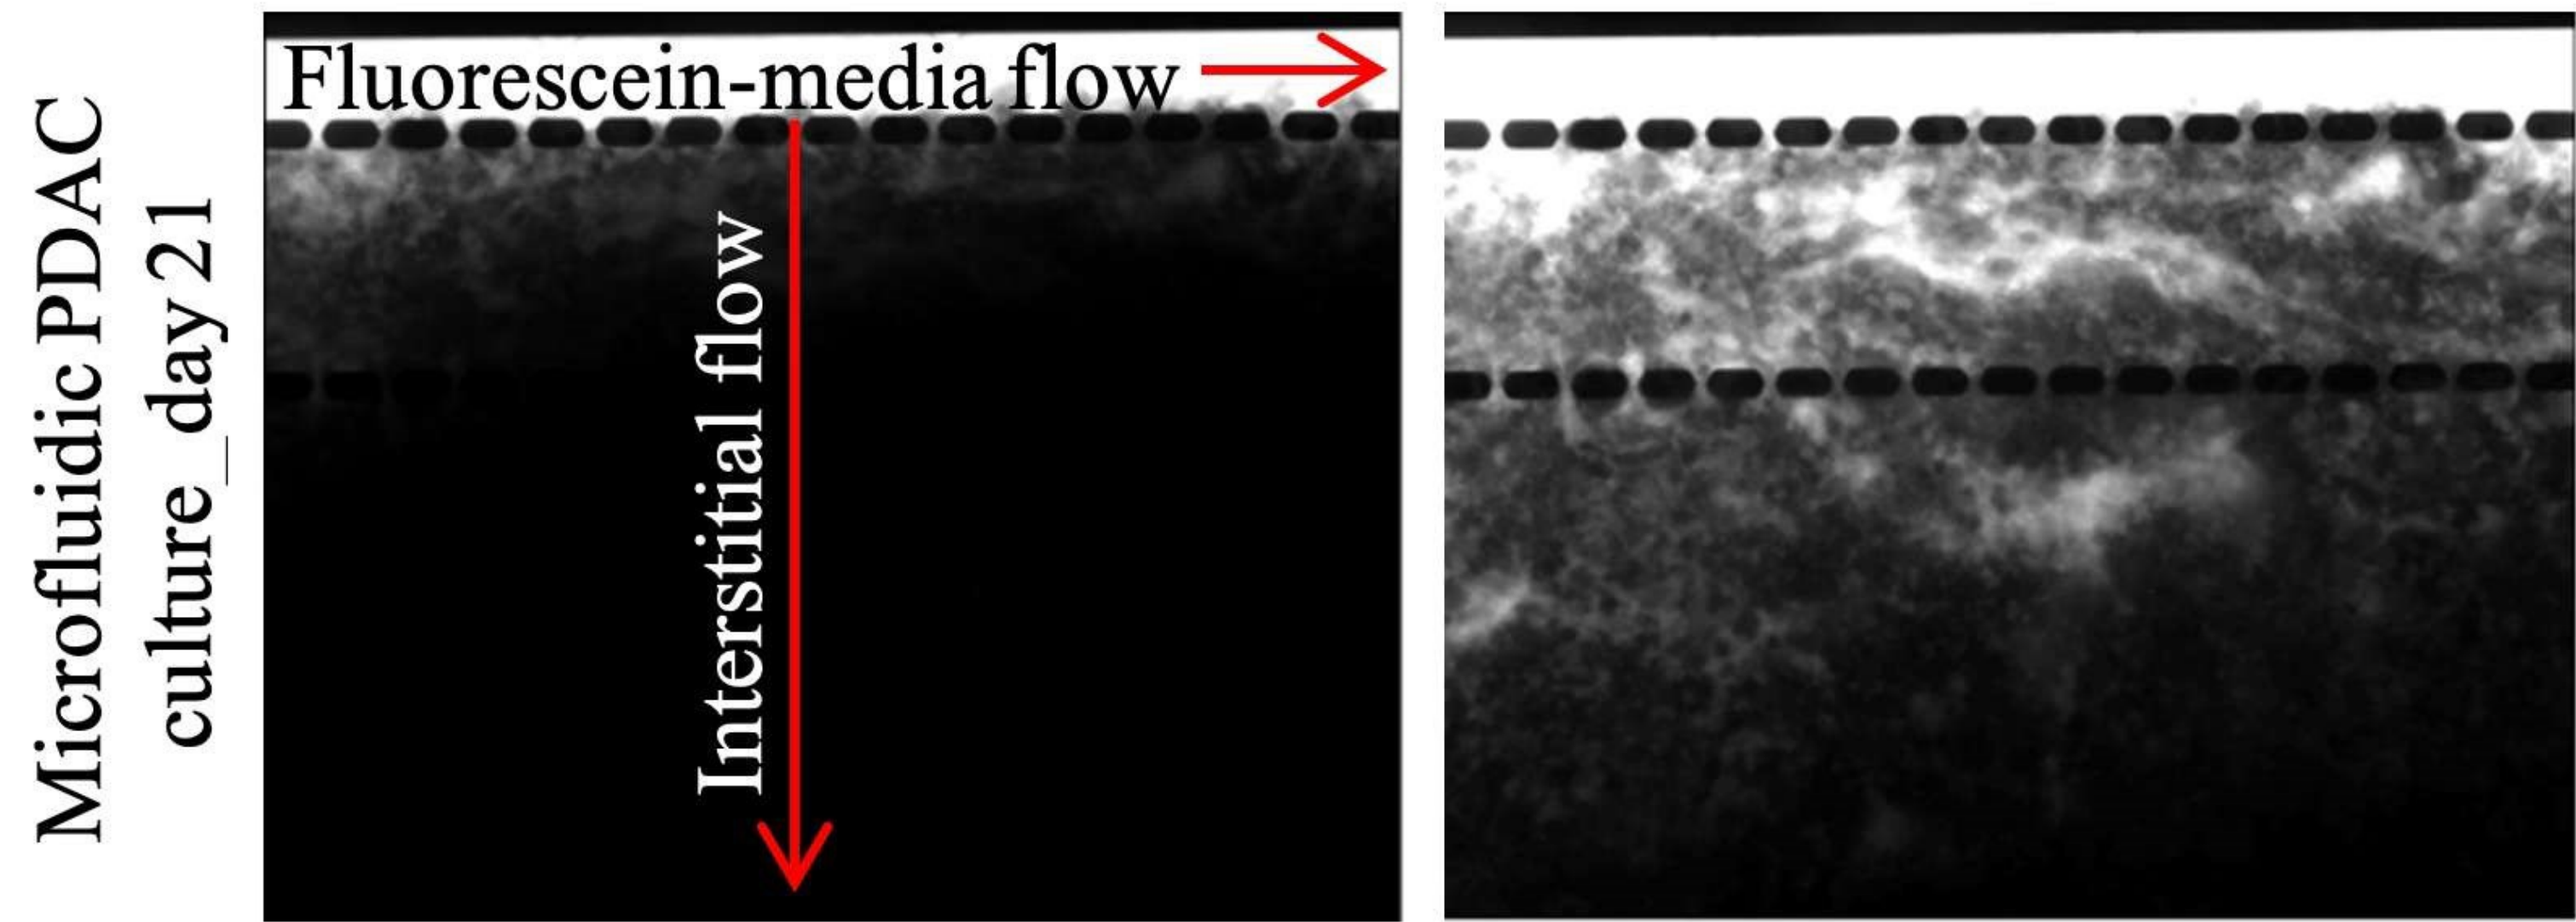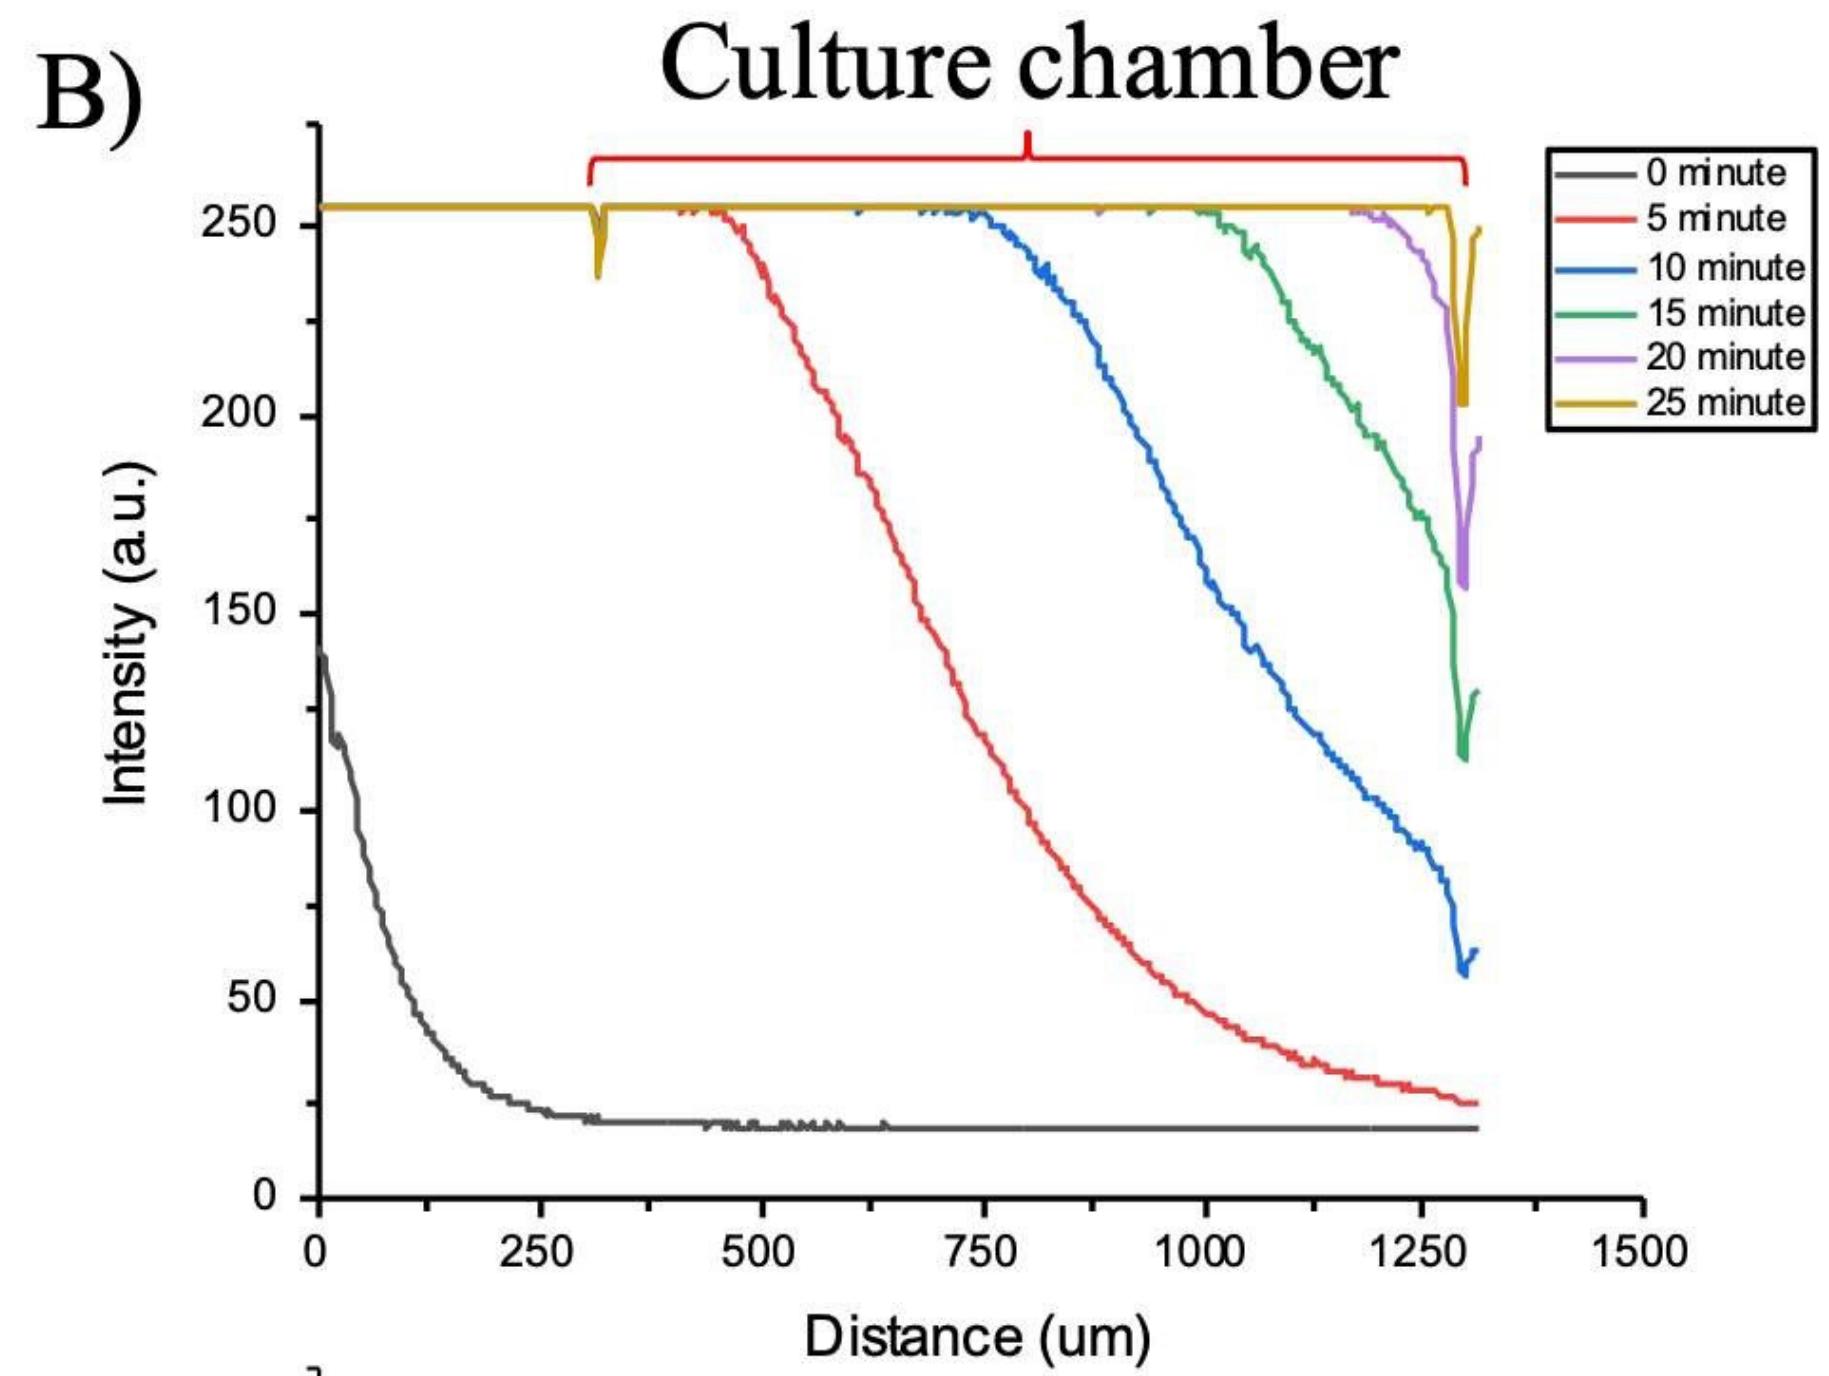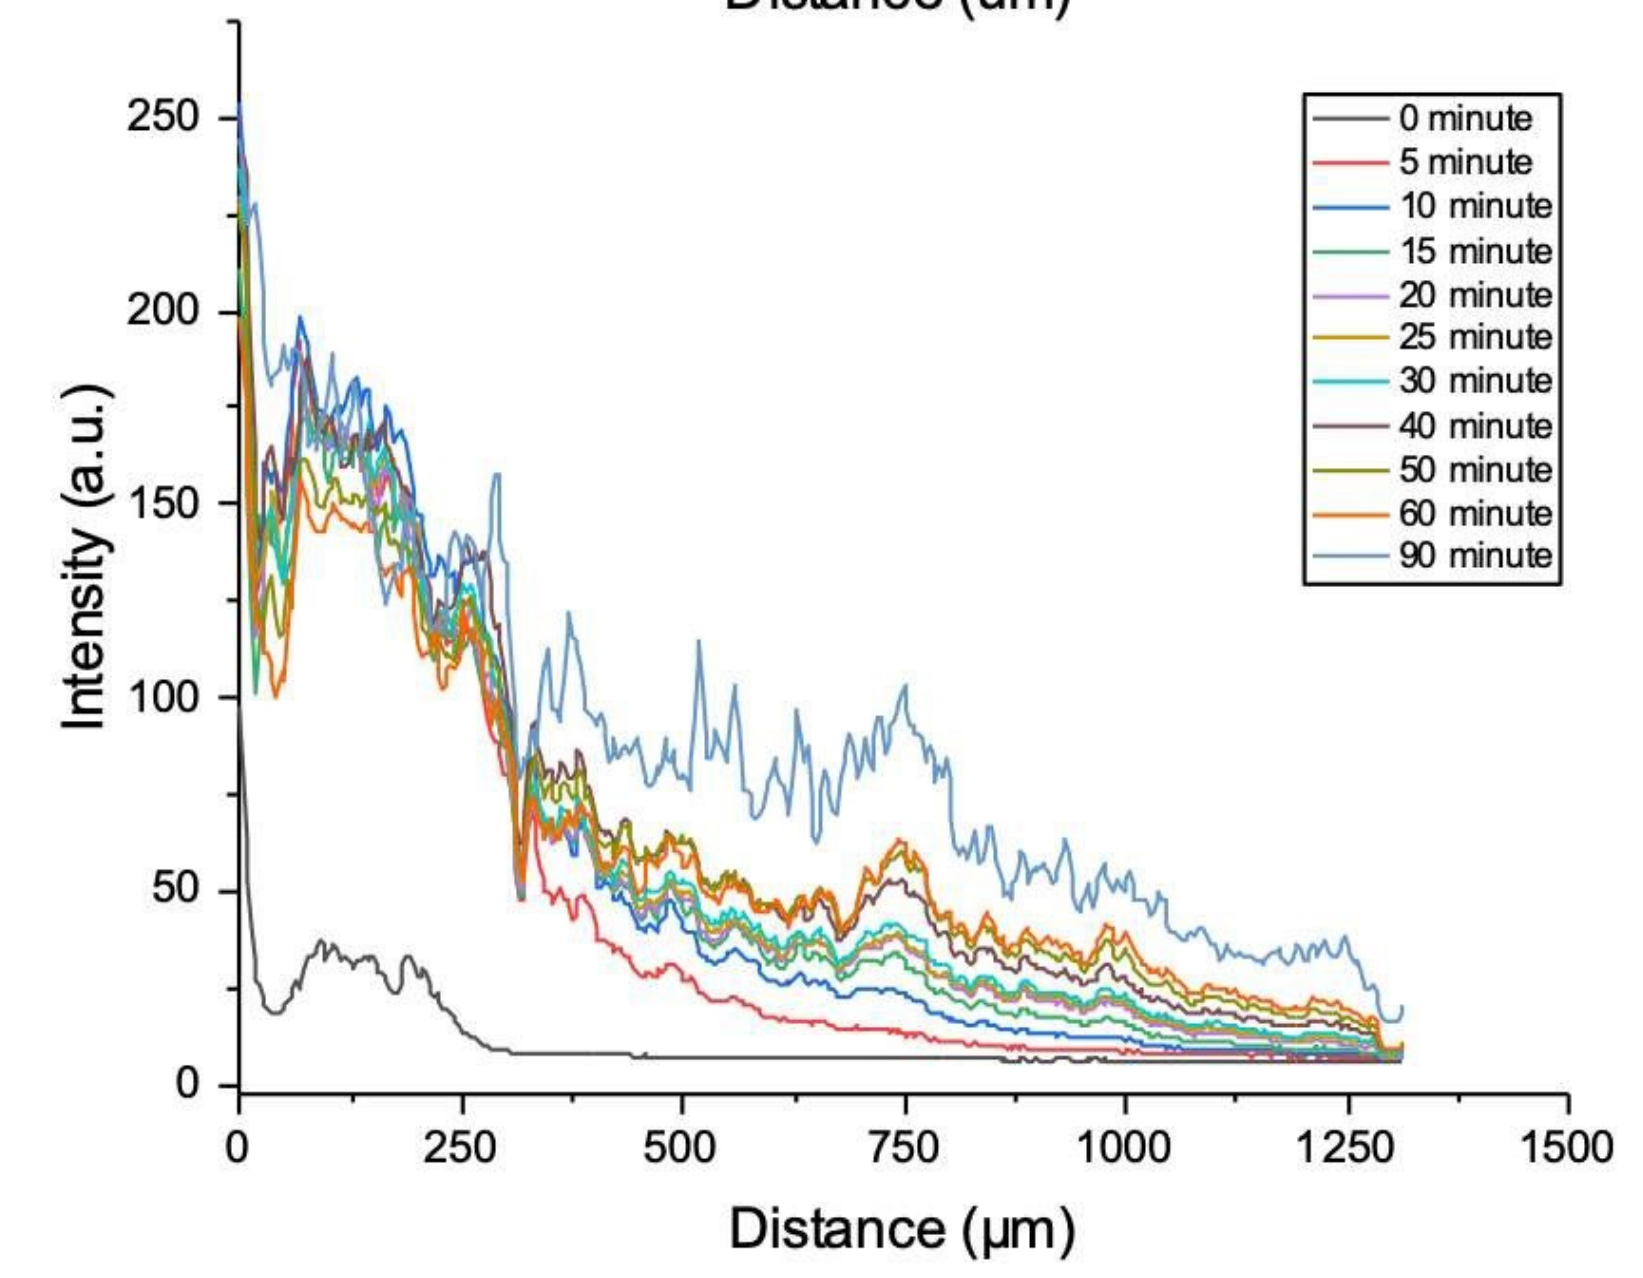

Supplement: d3lc00660c5.pdf [file d3lc00660c5.pdf]

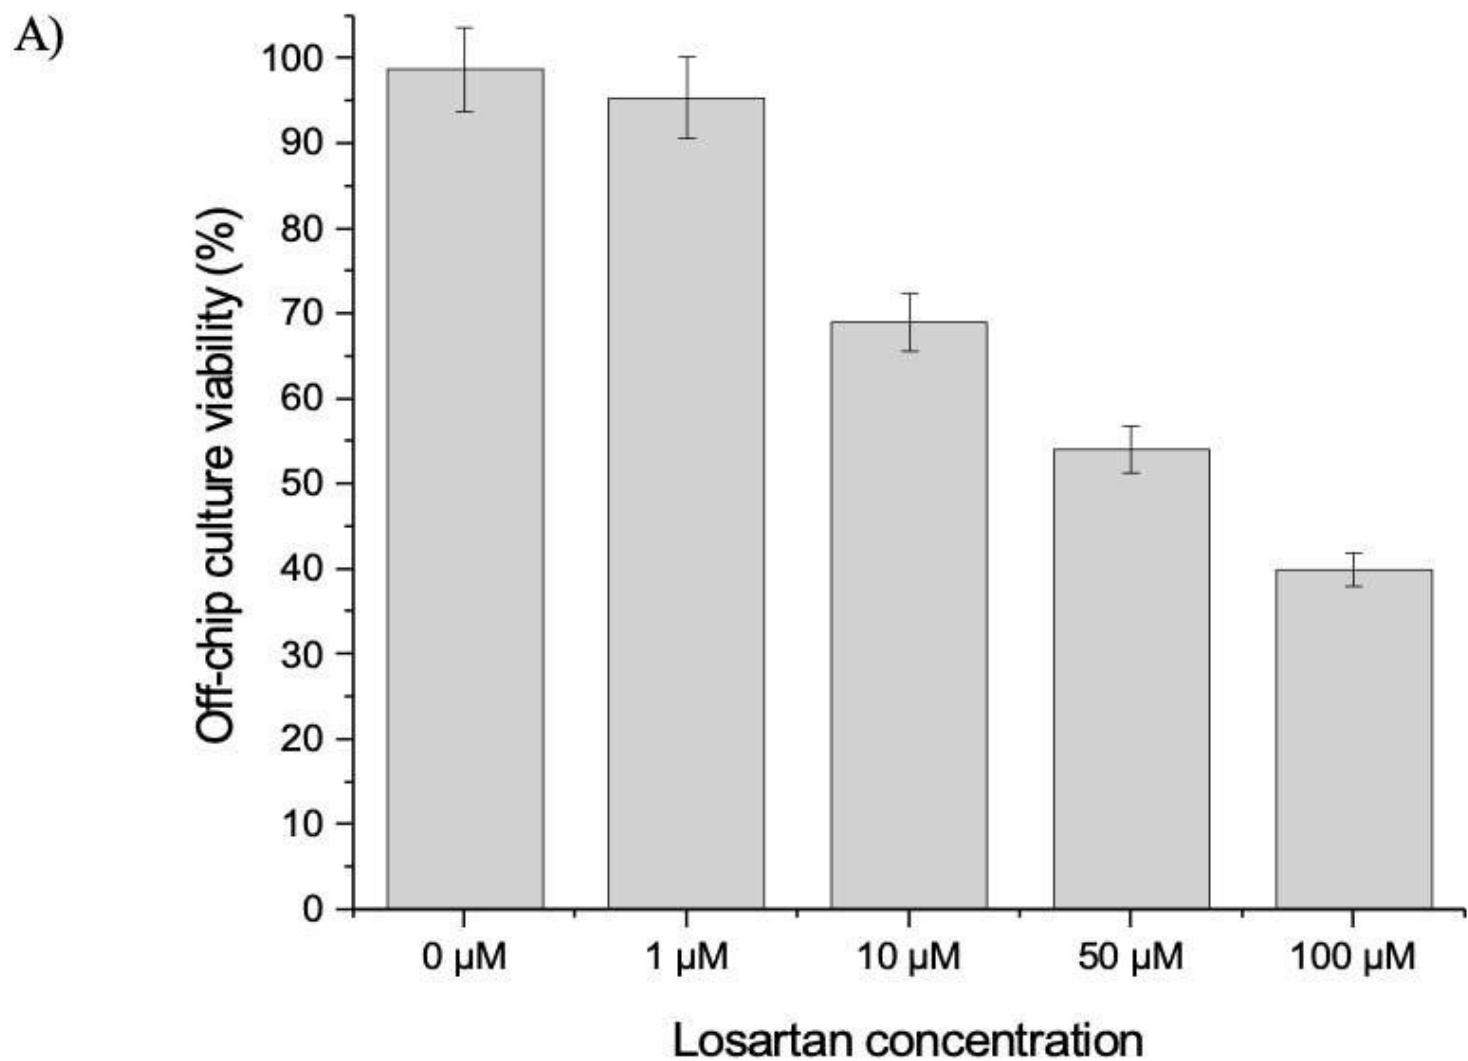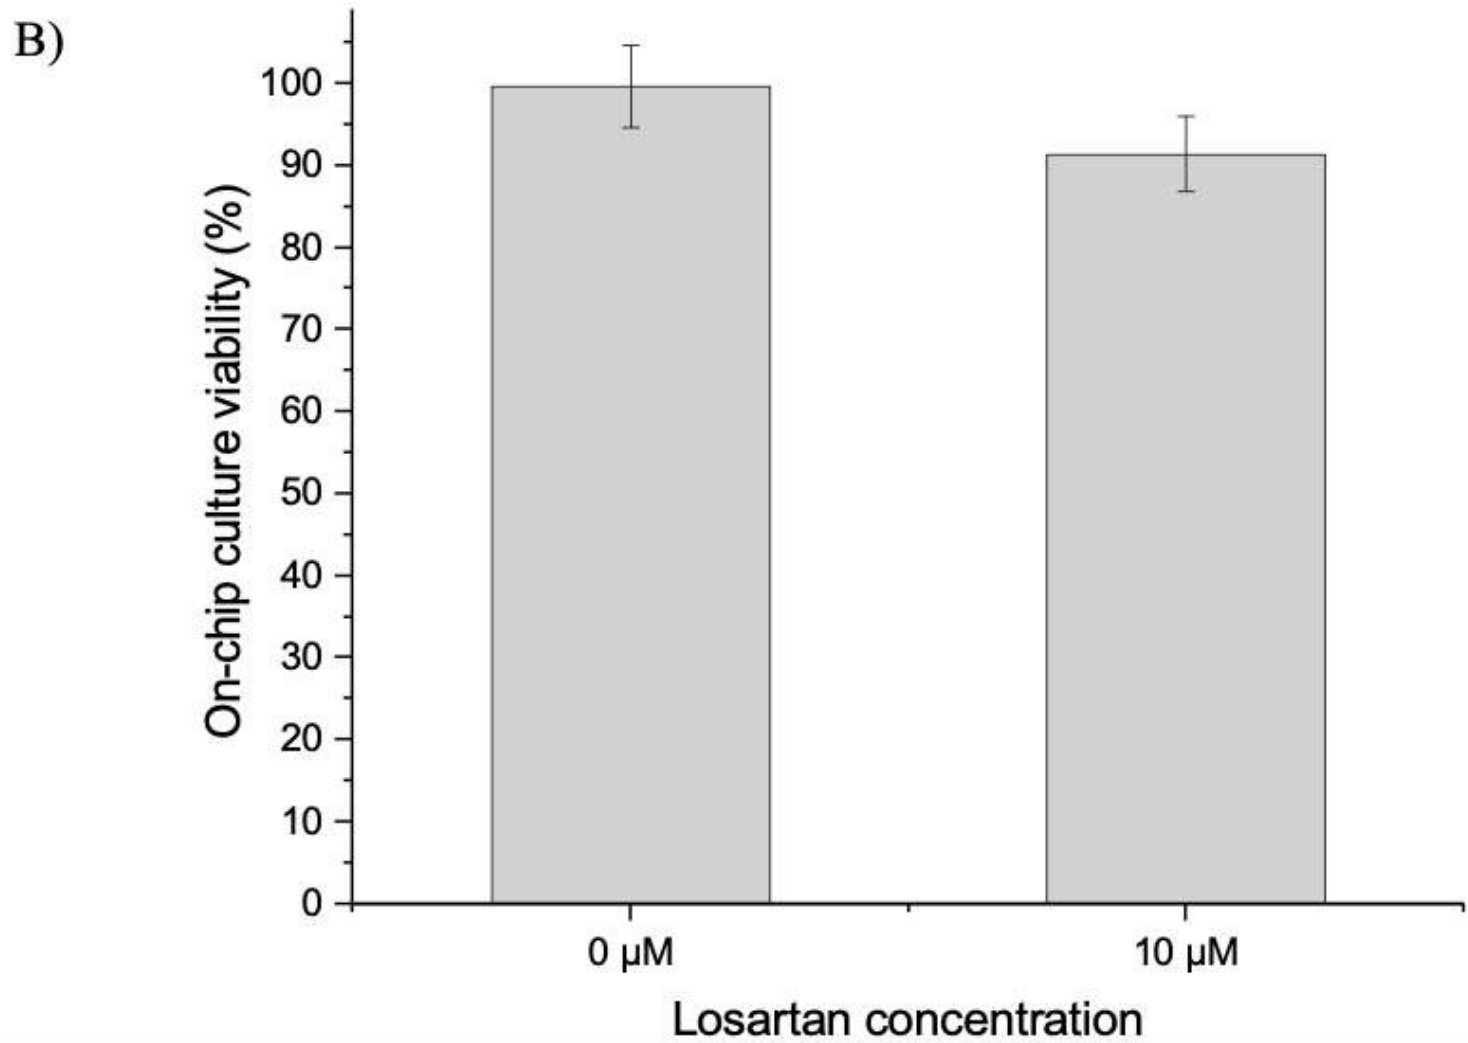

Supplement: d3lc00660c6.pdf [file d3lc00660c6.pdf]

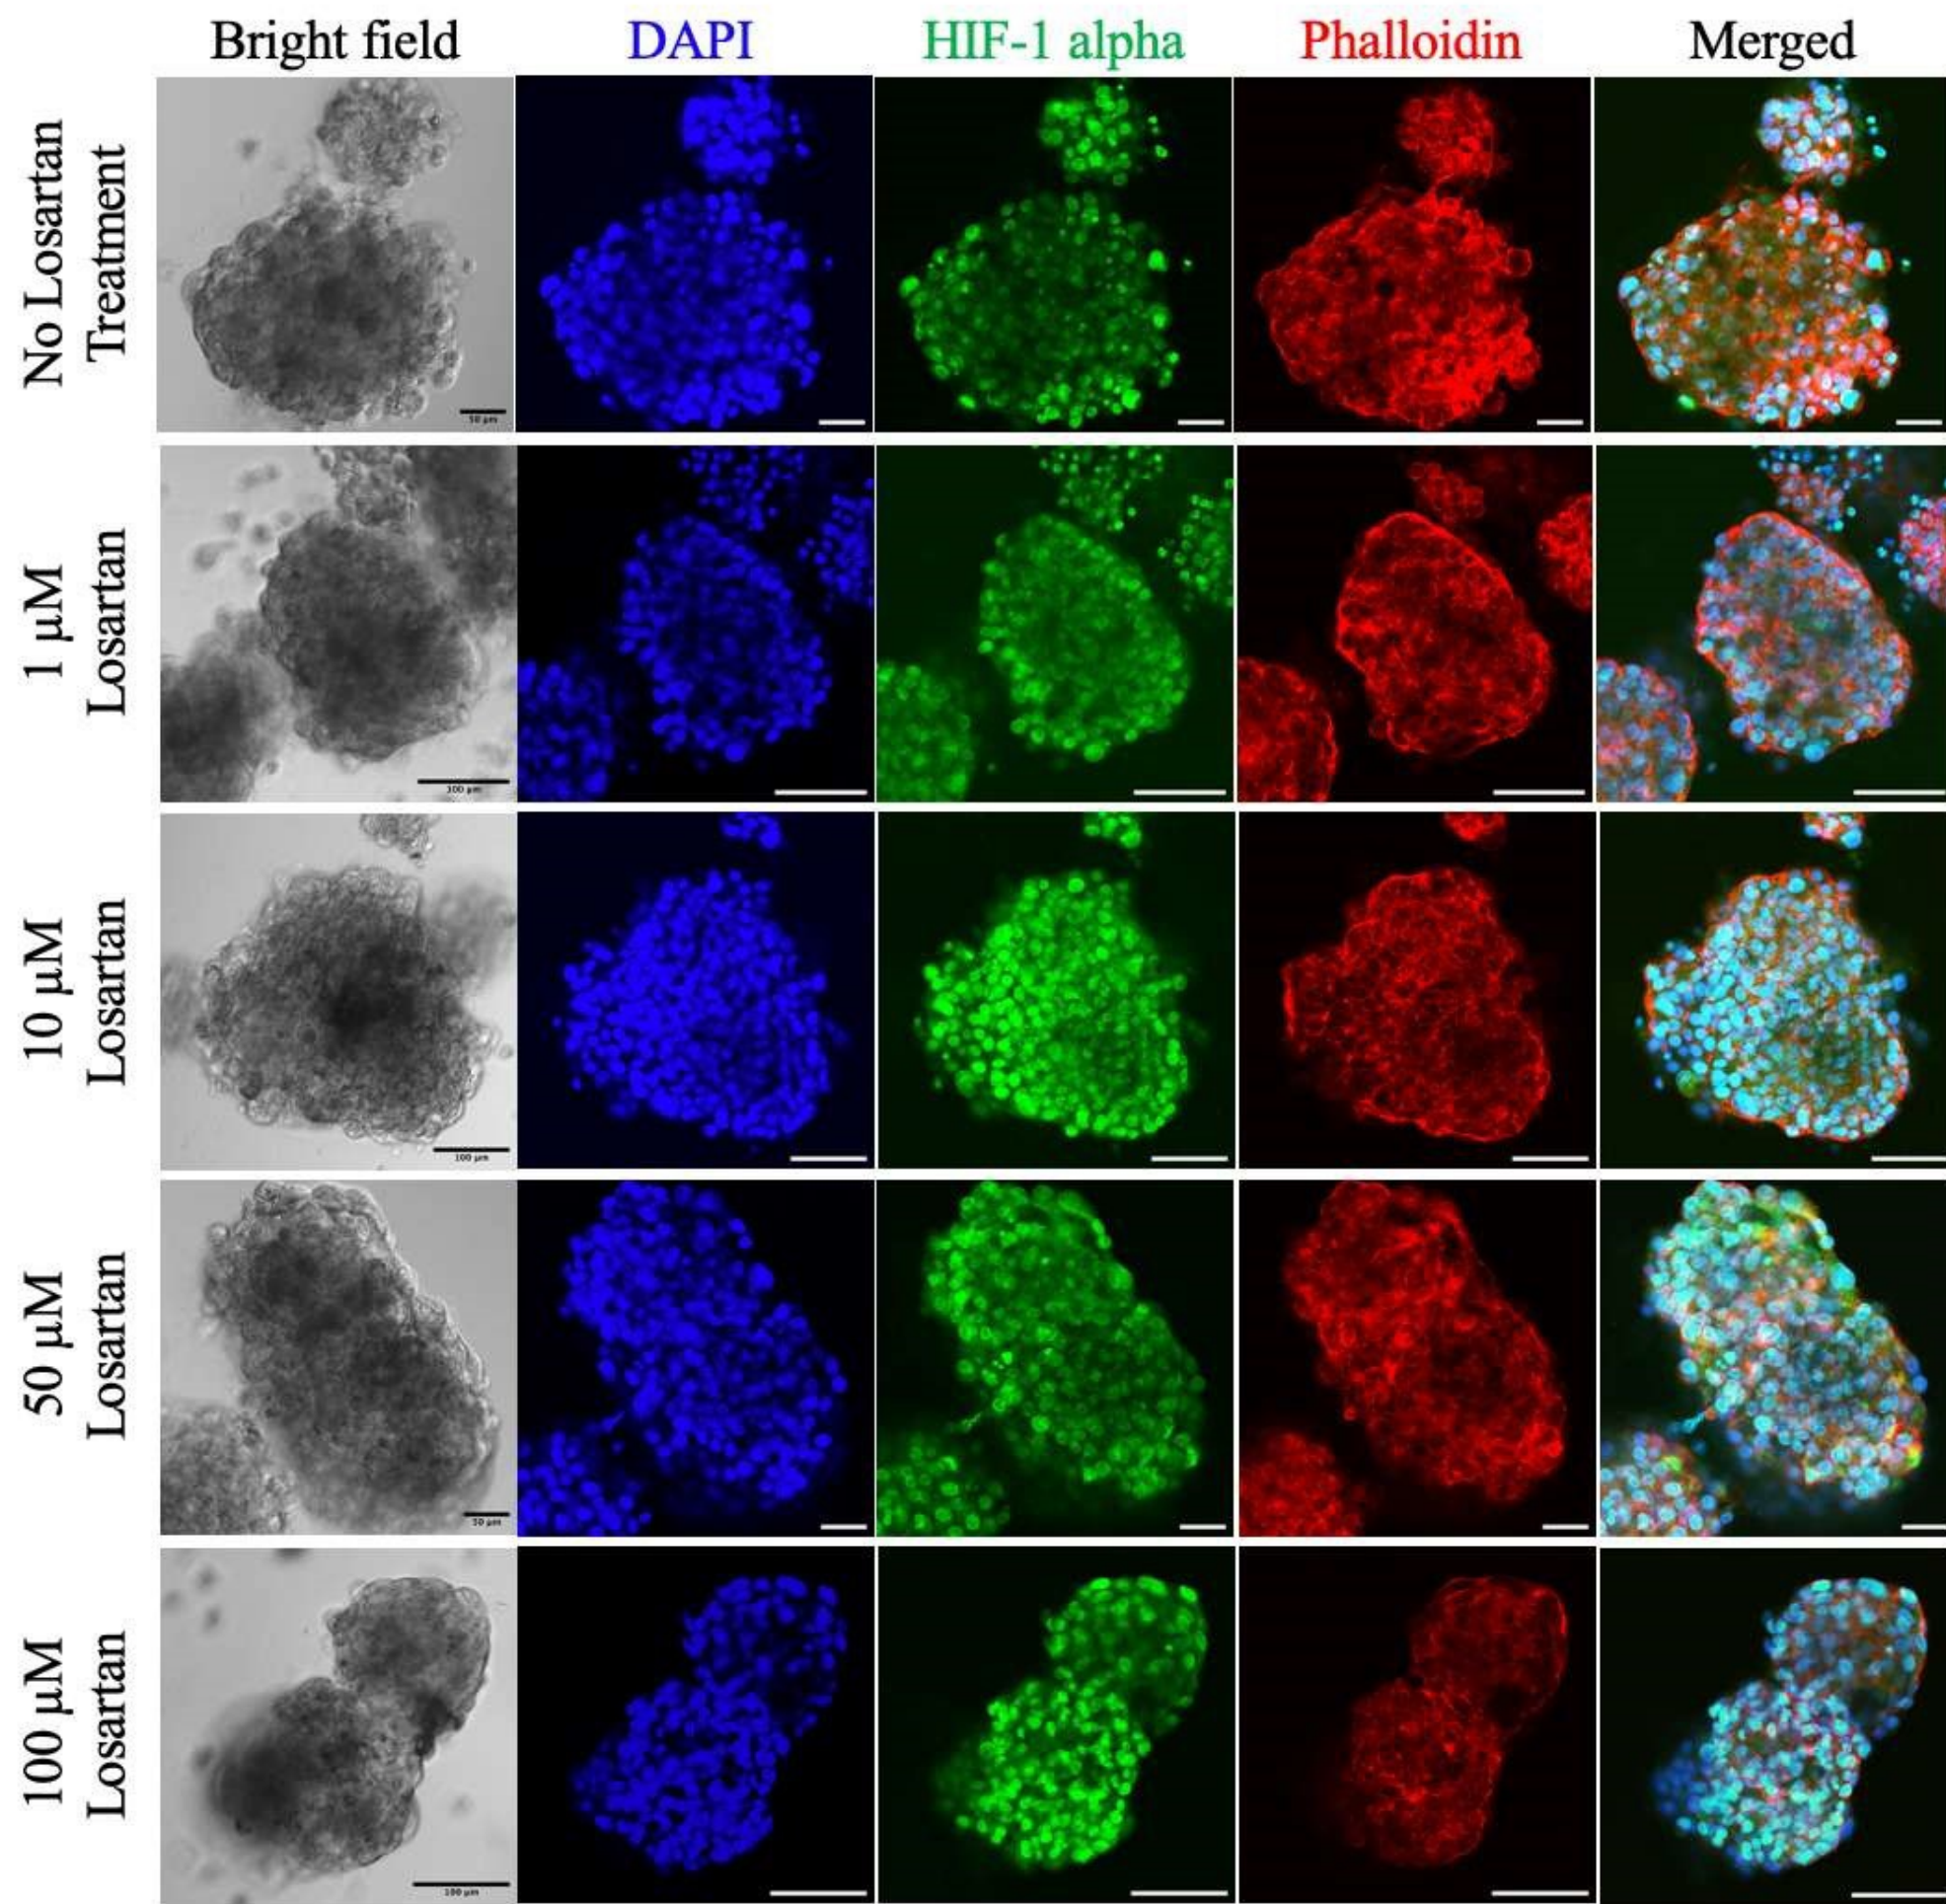

Supplement: d3lc00660c7.pdf [file d3lc00660c7.pdf]

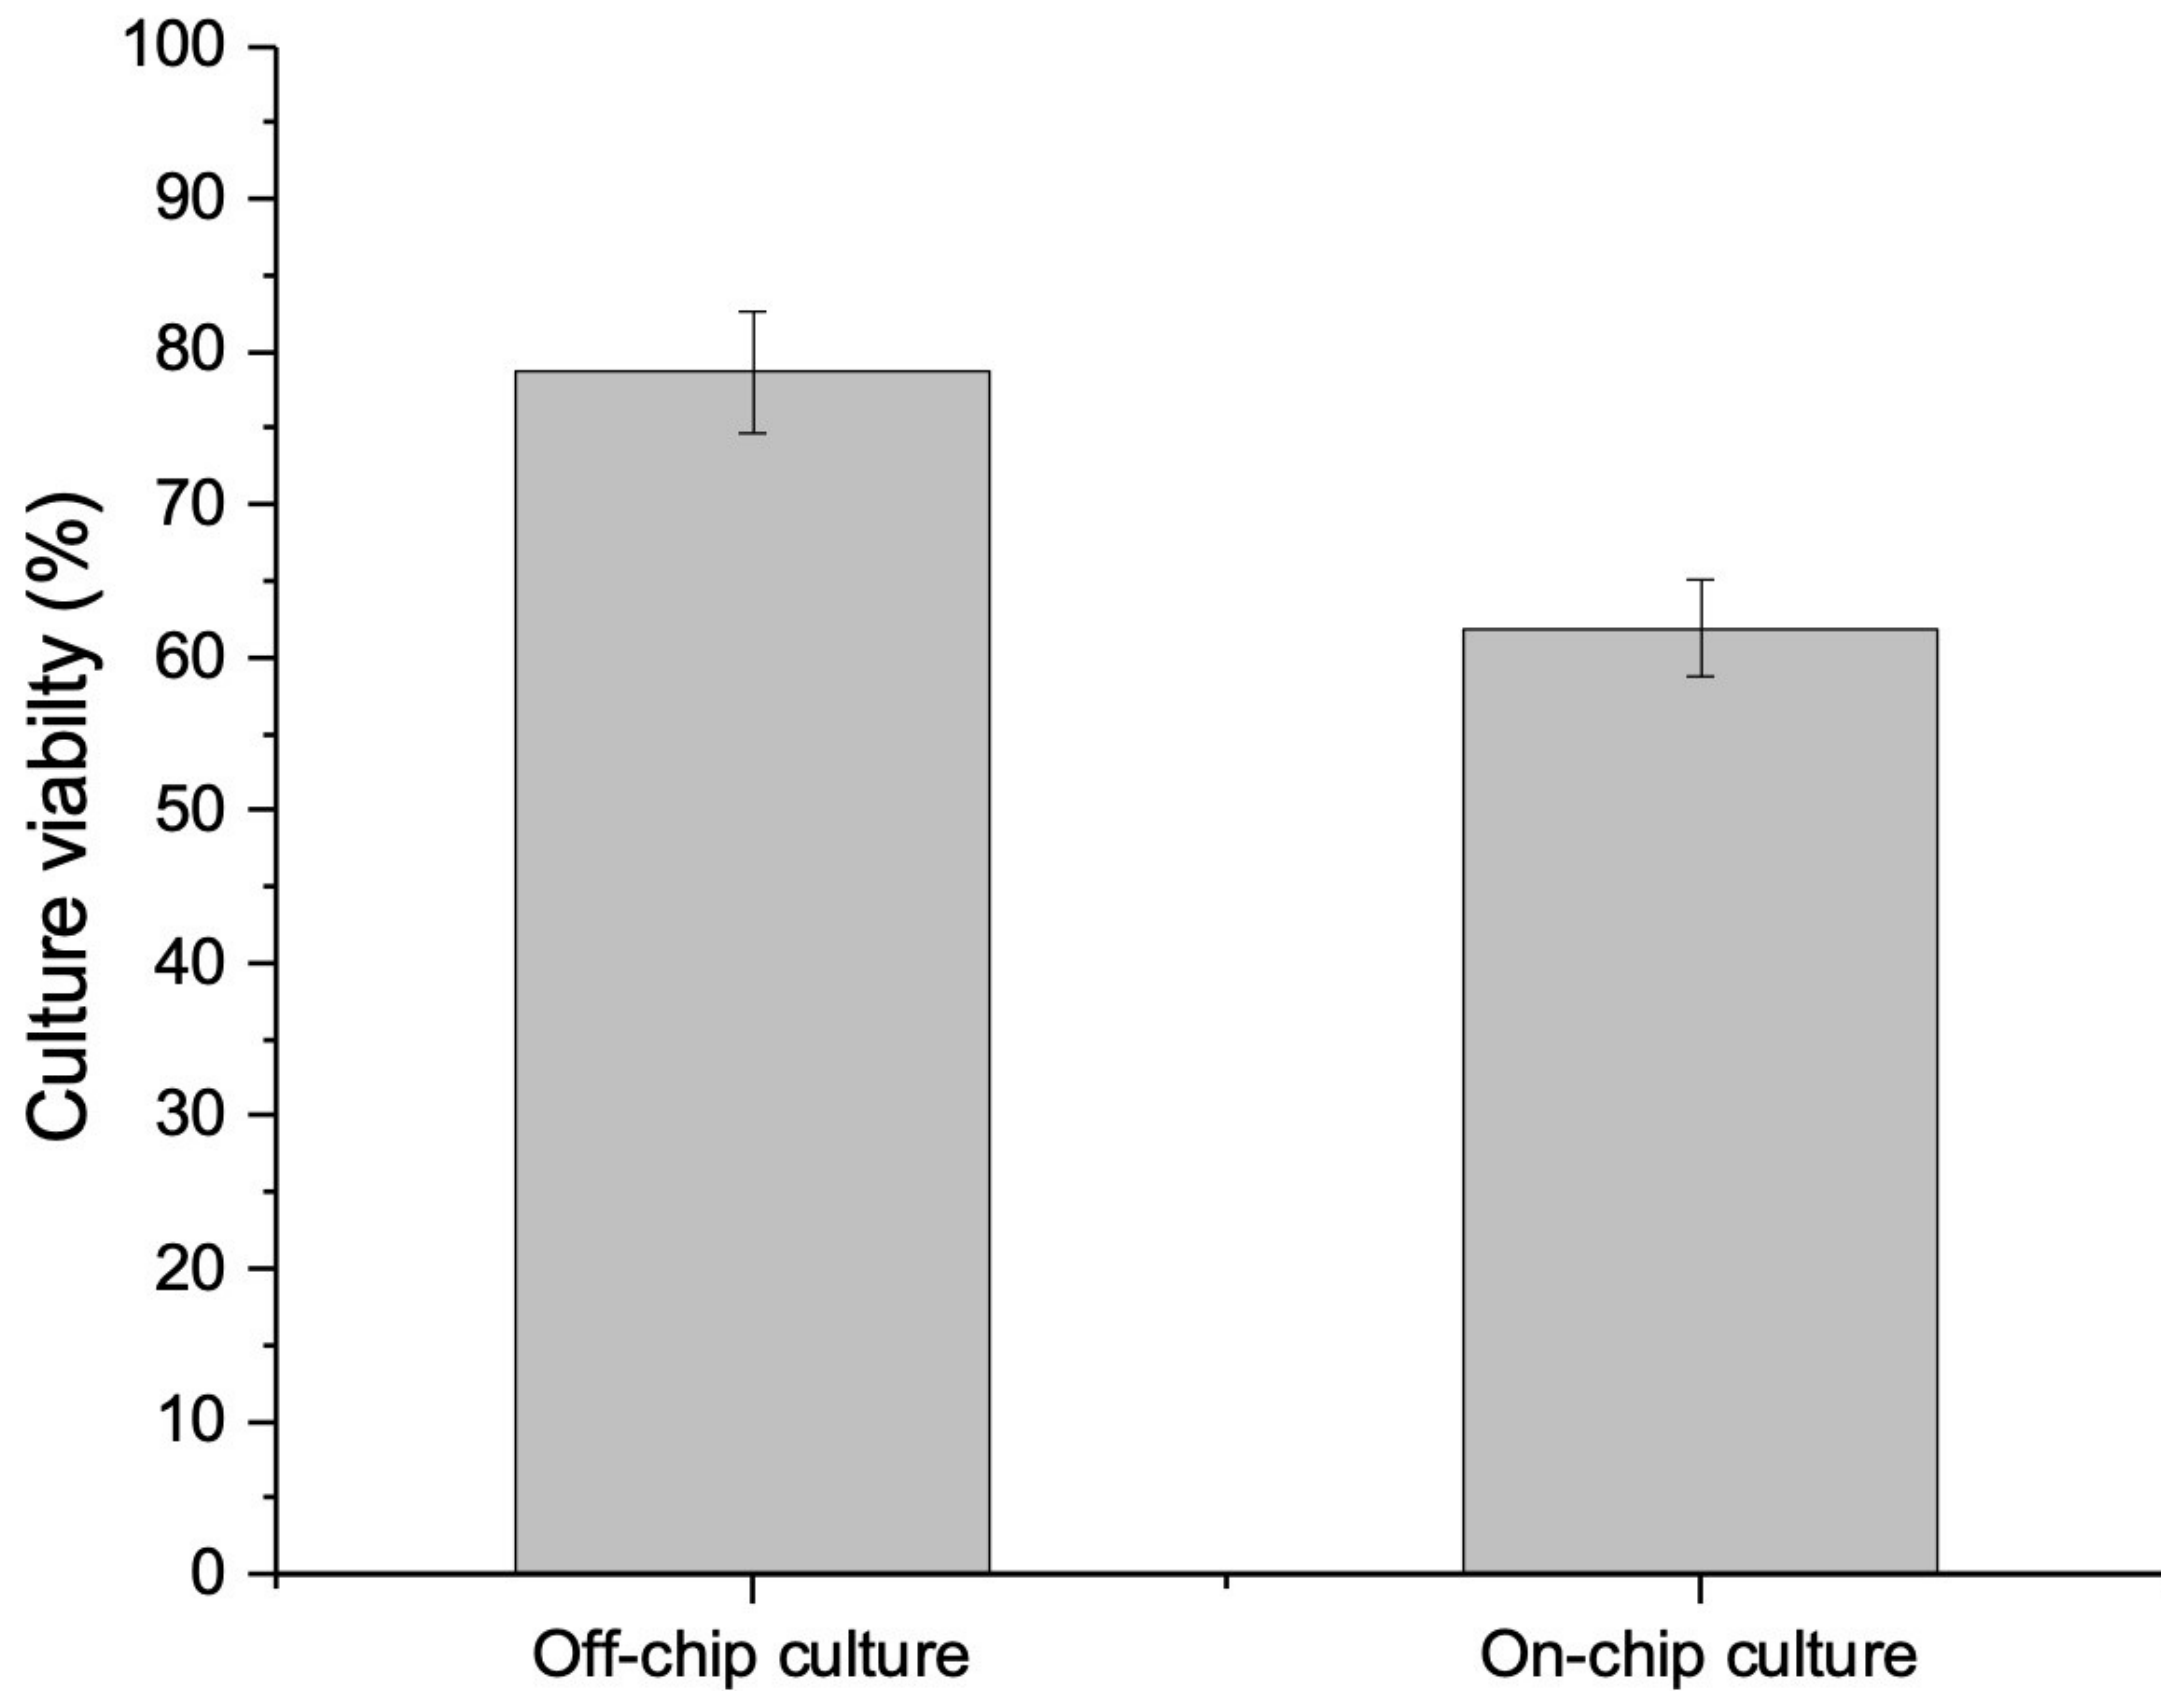

Supplement: d3lc00660c8.pdf [file d3lc00660c8.pdf]
